# Supplementary material
Source: MDPI journal article supplement (https://www.mdpi.com/2075-163X/7/3/42)
Supplement: s1 [file s1]

# Supplementary Materials: Strategies for Reduced Acid and Metalliferous Drainage by Pyrite Surface Passivation

Gujie Qian, Russell C. Schumann, Jun Li, Michael D. Short, Rong Fan, Yubiao Li, Nobuyuki Kawashima, Yan Zhou, Roger St. C. Smart and Andrea R. Gerson

## S1. Watering/Flushing Procedures for KLCs Using Synthetic Mine Waste

The detailed procedures for watering/flushing KLC tests using synthetic waste were as follows:

- The control KLC was only watered and flushed with Milli-Q water throughout the entire process ('Milli-Q water'; Figure 2).
- The second KLC ("Milli-Q with lime-saturated water"; Figure 2) was initially flushed with Milli-Q water (Flush 0 at week 0), then watered and flushed with lime-saturated water for the next monthly cycle (i.e., watering between weeks 1–3 and Flush 1 at week 4). The lime-saturated water was made by dissolving  $\text{Ca}(\text{OH})_2$  (>95% purity, Geo Discoveries) in Milli-Q water until saturation, after which the supernatant was used (alkalinity:  $\approx 1,900 \text{ mg CaCO}_3 \text{ L}^{-1}$ ). This was then followed by watering and flushing with Milli-Q water until the leachate pH dropped to  $< 5.5$ . At this time, lime-saturated water was once again used for watering and the next flush. On increase of the leachate pH to greater than 5.5, watering and flushing with Milli-Q water was resumed. This cycle is intended to test the requirement for lime-saturated water used alone, without calcite-saturated water, for maintenance of circum-neutral leachate pH.
- For the third KLC ("Calcite-saturated and lime-saturated water"; Figure 2), the operational procedures are the same as those for the second KLC (i.e., cycling lime treatment at  $\text{pH} < 5.5$ ) except that calcite-saturated water (made by dissolving a natural calcite in air-exposed Milli-Q water until saturation; alkalinity:  $\approx 30 \text{ mg CaCO}_3 \text{ L}^{-1}$ ) is used in lieu of Milli-Q water for all watering and flushing after Flush 1 when the leachate pH is  $> 5.5$  (which has remained the case to date). This cycle is intended to test the capacity of calcite-saturated water alone to maintain pyrite passivation after the initial establishment of surface passivation.
- For the fourth KLC ("Calcite-saturated water"; Figure 2), calcite-saturated water is used for watering/flushing throughout the leach process, except that Milli-Q water was used for Flush 0. There was no initial Flush 1 with lime-saturated water as per the third KLC. This KLC test is intended to test the effectiveness of watering/flushing with calcite-saturated water alone for establishment and maintenance of pyrite surface passivation.

## S2. The Elemental Composition of Pyrite

The elemental composition of pyrite used for the KLCs with synthetic waste is given in Table S1.

Table S1. The composition (in ppm) of pyrite.

| Sample          | Al  | As | Ba  | Ca  | Cl  | Cu  | F    | Fe     | K  | Mg  |
|-----------------|-----|----|-----|-----|-----|-----|------|--------|----|-----|
| Pyrite          | 100 | 30 | <5  | 100 | <60 | 80  | <100 | 428000 | 60 | <30 |
| Detection limit | 10  | 5  | 5   | 30  | 60  | 5   | 100  | 5      | 50 | 30  |
| Sample          | Mn  | Ni | Na  | P   | Pb  | Si  | Sr   | Ti     | V  | Zn  |
| pyrite          | <5  | 4  | <50 | 40  | 40  | <30 | 5    | <5     | <5 | 100 |
| Detection limit | 5   | 3  | 50  | 30  | 5   | 30  | 3    | 5      | 5  | 5   |

### S3. Leachate Chemistry

The ICP-OES results and  $E_h$ /volumes of leachates for KLC tests using natural wastes are given in Table S2.

**Table S2.**  $E_h$  and elemental concentrations for the calculation of saturation index and ferric concentration using PHREEQC and the Nernst equation.

| KLC test           | Flushing Time (week) | Volume collected (mL) | $E_h$ (mV, SHE) | mg/L |       |       |        |      |       |        |      |     |      |      |     |      |      |
|--------------------|----------------------|-----------------------|-----------------|------|-------|-------|--------|------|-------|--------|------|-----|------|------|-----|------|------|
|                    |                      |                       |                 | Na   | Mg    | Al    | S      | K    | Ca    | Fe     | Zn   | Pb  | Si   | Ni   | Co  | Cu   | Mn   |
| Natural PAF Only   | 0                    | 269                   | 725             | 1.5  | 62.5  | 137.3 | 2080.0 | 1.6  | 36.3  | 2060.0 | 3.1  | 0.0 | 1.2  | 4.5  | 3.2 | 15.9 | 3.8  |
|                    | 4                    | 432                   | 695             | 0.2  | 168.1 | 330.8 | 3579.0 | BD   | 49.9  | 3926.0 | 11.3 | BD  | 6.4  | 10.2 | 5.7 | 41.3 | 10.6 |
|                    | 8                    | 412                   | 665             | BD   | 113.4 | 249.6 | 3431.0 | BD   | 26.6  | 3559.0 | 7.3  | BD  | 6.4  | 8.1  | 3.6 | 25.3 | 6.0  |
|                    | 12                   | 427                   | 660             | BD   | 146.2 | 337.9 | 5353.0 | BD   | 22.6  | 5542.0 | 10.3 | BD  | 6.3  | 11.4 | 4.4 | 27.5 | 8.3  |
|                    | 16                   | 427                   | 650             | 10.3 | 197.7 | 465.0 | 5710.7 | 0.6  | 29.5  | 7690.8 | 12.2 | 0.4 | 17.4 | 8.9  | 3.4 | 23.6 | 6.2  |
|                    | 20                   | 420                   | 667             | 1.1  | 118.9 | 290.0 | 4399.3 | BD   | 23.5  | 5752.3 | 7.1  | 0.3 | 12.5 | 6.5  | 2.4 | 14.2 | 4.4  |
|                    | 24                   | 338                   | 670             | BD   | 96.6  | 255.5 | 6590.1 | BD   | 19.4  | 7164.2 | 5.7  | 0.2 | 6.3  | 7.5  | 2.8 | 13.4 | 5.2  |
|                    | 28                   | 485                   | 691             | BD   | 47.2  | 129.5 | 2887.5 | 0.1  | 15.6  | 3145.8 | 2.9  | 0.2 | 3.2  | 3.9  | 1.4 | 6.3  | 2.5  |
|                    | 32                   | 475                   | 680             | 0.6  | 48.4  | 139.3 | 5790.3 | BD   | 23.6  | 5835.7 | 3.0  | 0.1 | 3.3  | 4.0  | 1.6 | 6.7  | 2.8  |
|                    | 36                   | 377                   | 698             | BD   | 18.4  | 52.7  | 4787.3 | BD   | 7.9   | 5188.1 | 1.2  | 0.1 | 1.3  | 2.1  | 0.8 | 2.6  | 1.3  |
| Natural PAF + lime | 0                    | 231                   | 360             | 1.4  | BD    | BD    | 505.5  | 2.3  | 799.3 | BD     | BD   | BD  | 0.3  | BD   | BD  | BD   | BD   |
|                    | 4                    | 273                   | 390             | BD   | 31.5  | BD    | 418.9  | 2.1  | 475.3 | 2.1    | 0.0  | BD  | 1.4  | 0.1  | 0.1 | 0.3  | 0.3  |
|                    | 8                    | 253                   | 334             | BD   | 54.2  | 11.0  | 460.8  | BD   | 430.6 | 36.5   | 0.5  | BD  | 5.2  | 0.8  | 0.8 | 1.8  | 1.2  |
|                    | 12                   | 247                   | 590             | 56.9 | 218.1 | 5.3   | 680.2  | 24.9 | 414.2 | 6.2    | 0.3  | BD  | 8.3  | 0.9  | 0.8 | 3.3  | 1.3  |
|                    | 16                   | 277                   | 646             | 2.2  | 91.8  | 50.4  | 682.1  | 1.7  | 467.8 | 118.7  | 1.3  | 0.1 | 7.6  | 1.7  | 1.1 | 4.9  | 1.8  |
|                    | 20                   | 268                   | 675             | 1.7  | 109.5 | 91.8  | 1258.9 | 0.4  | 430.9 | 903.5  | 2.0  | 0.1 | 9.1  | 2.9  | 1.8 | 8.1  | 2.9  |
|                    | 24                   | 292                   | 683             | 0.8  | 83.2  | 73.4  | 1679.4 | 0.3  | 332.0 | 1739.7 | 1.6  | 0.0 | 1.7  | 3.2  | 2.0 | 7.1  | 3.3  |
|                    | 28                   | 468                   | 710             | 1.8  | 67.4  | 153.8 | 4007.0 | BD   | 206.4 | 3646.0 | 2.8  | 0.2 | 3.0  | 5.4  | 2.9 | 14.5 | 4.9  |
|                    | 32                   | 538                   | 680             | 0.5  | 56.0  | 144.2 | 4971.7 | BD   | 202.6 | 4770.2 | 2.5  | 0.2 | 2.8  | 4.5  | 2.7 | 13.0 | 4.7  |
|                    | 36                   | 409                   | 723             | 1.8  | 15.4  | 40.1  | 3258.9 | BD   | 118.6 | 2940.5 | 0.8  | 0.0 | 0.8  | 1.7  | 0.9 | 3.7  | 1.5  |

Table S2. Cont.

| KLC test                  | Flushing Time (week) | Volume collected (mL) | E <sub>h</sub> (mV, SHE) | mg/L |       |      |       |      |        |       |     |     |      |     |     |     |     |
|---------------------------|----------------------|-----------------------|--------------------------|------|-------|------|-------|------|--------|-------|-----|-----|------|-----|-----|-----|-----|
|                           |                      |                       |                          | Na   | Mg    | Al   | S     | K    | Ca     | Fe    | Zn  | Pb  | Si   | Ni  | Co  | Cu  | Mn  |
| Natural PAF + lime + NAF1 | 0                    | 246                   | 319                      | 1.7  | BD    | BD   | 532.7 | 2.8  | 881.2  | BD    | BD  | BD  | 0.5  | BD  | BD  | BD  | BD  |
|                           | 4                    | 390                   | 375                      | 1.8  | 102.4 | BD   | 554.5 | 4.2  | 458.7  | BD    | BD  | BD  | 1.9  | BD  | 0.0 | 0.0 | 0.1 |
|                           | 8                    | 374                   | 392                      | 1.4  | 109.9 | BD   | 466.2 | 4.9  | 414.6  | BD    | BD  | BD  | 2.0  | BD  | 0.1 | 0.0 | 0.1 |
|                           | 12                   | 403                   | 530                      | 1.4  | 151.0 | BD   | 464.5 | 4.7  | 348.8  | BD    | BD  | BD  | 4.5  | BD  | 0.0 | 0.0 | 0.1 |
|                           | 16                   | 414                   | 560                      | 3.7  | 229.7 | BD   | 558.0 | 7.7  | 414.1  | 0.2   | 0.0 | 0.0 | 2.7  | 0.0 | 0.1 | 0.0 | 0.2 |
|                           | 20                   | 497                   | 630                      | 3.0  | 164.3 | BD   | 496.5 | 6.4  | 384.6  | 0.4   | 0.1 | 0.1 | 2.9  | 0.0 | 0.1 | 0.0 | 0.2 |
|                           | 24                   | 472                   | 530                      | 1.8  | 122.0 | BD   | 373.5 | 5.9  | 298.3  | 0.6   | BD  | BD  | BD   | 0.0 | 0.1 | 0.0 | 0.3 |
|                           | 28                   | 635                   | 540                      | 7.2  | 212.5 | 0.7  | 465.3 | 12.1 | 298.8  | 3.1   | 0.2 | BD  | 0.2  | 0.2 | 0.4 | 0.2 | 1.0 |
|                           | 32                   | 602                   | 525                      | 5.8  | 161.7 | 4.3  | 413.5 | 13.4 | 292.8  | 5.8   | 0.4 | 0.0 | 0.4  | 0.1 | 0.4 | 0.7 | 0.9 |
|                           | 36                   | 533                   | 540                      | 0.6  | 69.9  | 5.5  | 280.7 | 6.9  | 265.9  | 6.7   | 0.2 | BD  | 0.2  | BD  | 0.2 | 0.8 | 0.4 |
| Natural PAF + lime + NAF2 | 0                    | 231                   | 376                      | 24.8 | BD    | BD   | 561.2 | 6.7  | 1128.0 | BD    | BD  | 0.0 | 0.3  | BD  | BD  | BD  | BD  |
|                           | 4                    | 323                   | 380                      | 91.1 | 154.8 | BD   | 784.8 | 18.5 | 504.9  | BD    | 0.0 | BD  | 3.1  | BD  | 0.1 | 0.1 | 1.5 |
|                           | 8                    | 303                   | 350                      | 83.6 | 226.2 | BD   | 733.3 | 26.7 | 436.4  | 1.2   | 0.1 | BD  | 5.7  | 0.1 | 0.3 | 0.3 | 4.3 |
|                           | 12                   | 340                   | 540                      | 11.3 | 64.5  | 21.7 | 471.2 | 2.5  | 385.6  | 60.9  | 0.7 | BD  | 2.0  | 0.5 | 0.7 | 1.2 | 5.2 |
|                           | 16                   | 349                   | 550                      | 58.1 | 242.7 | 18.5 | 814.6 | 34.8 | 527.6  | 1.0   | 0.9 | 0.1 | 14.1 | 1.3 | 1.3 | 2.3 | 8.8 |
|                           | 20                   | 419                   | 570                      | 33.9 | 197.0 | 24.2 | 683.2 | 24.9 | 555.8  | 2.4   | 1.6 | 0.1 | 17.1 | 1.1 | 1.3 | 3.2 | 8.0 |
|                           | 24                   | 389                   | 590                      | 60.3 | 138.0 | 19.1 | 613.2 | 22.5 | 412.8  | 4.1   | 0.9 | BD  | 1.0  | 1.1 | 1.3 | 2.9 | 8.6 |
|                           | 28                   | 607                   | 608                      | 23.8 | 104.3 | 51.9 | 568.0 | 14.9 | 409.0  | 59.3  | 1.3 | 0.0 | 1.4  | 0.5 | 1.2 | 6.7 | 8.7 |
|                           | 32                   | 625                   | 613                      | 10.2 | 74.3  | 45.2 | 543.0 | 9.2  | 403.3  | 84.0  | 0.6 | BD  | 0.6  | 0.6 | 0.4 | 6.1 | 5.3 |
|                           | 36                   | 528                   | 624                      | 5.1  | 50.0  | 35.0 | 661.2 | 4.7  | 404.8  | 279.0 | 0.4 | BD  | 0.4  | 0.8 | 0.3 | 4.4 | 6.1 |

BD: below detection limit.
